# Supplementary material for: Hybrid Lipid/Clay Carrier Systems Containing Annatto Oil for Topical Formulations
Source: MDPI journal article supplement (doi:10.3390/pharmaceutics14051067), 2022-05-17
Supplement: s1 [file s1]

# Supplementary Material

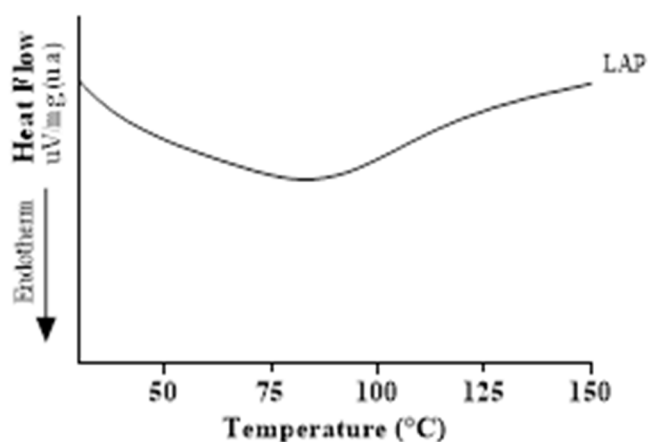

**Figure S1.** LAP presented a small event at 102°C, which is related to the loss of adsorption water and because it is characterized as a solid material with very low crystallinity.

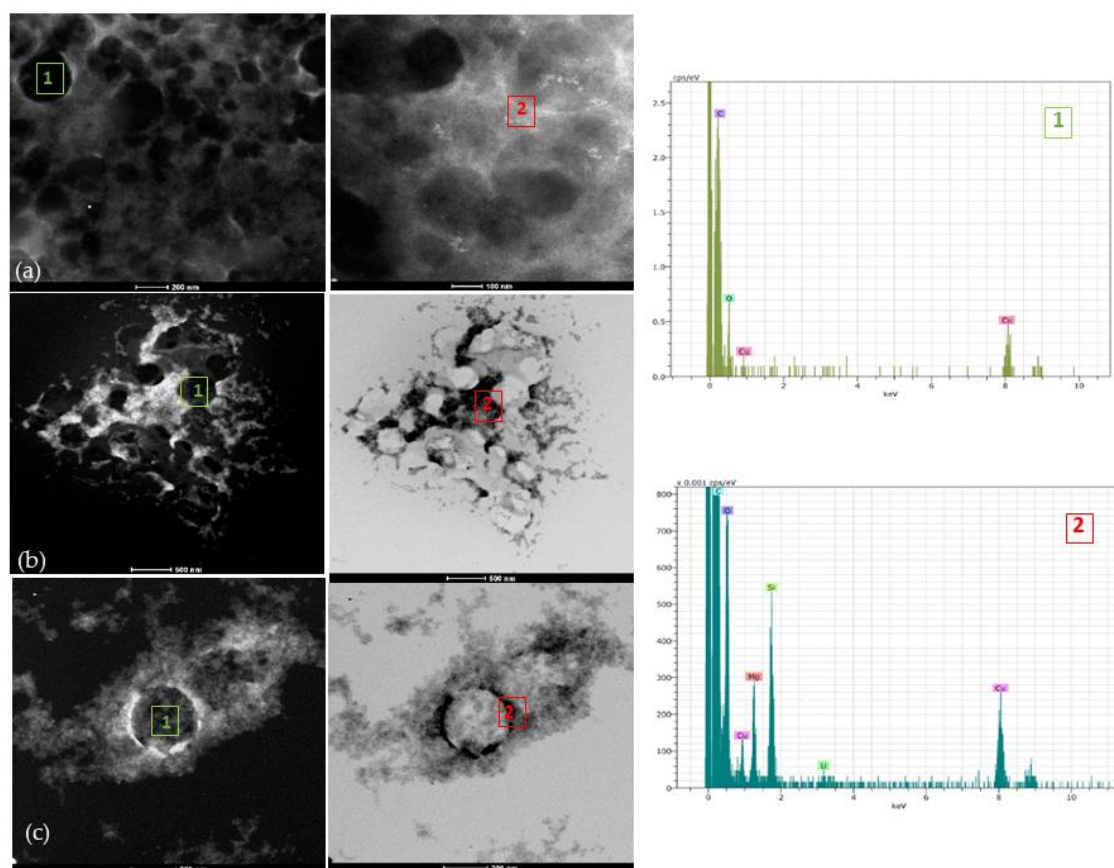

**Figure S2.** UHRTEM microphotographs with XEDS analysis of CPn\_L (a), CPn2\_L (b) and CPn4\_L (c). Scale bars =100-500 nm. Note: the number 1 (highlighted in green), and 2 (highlighted in red) corresponds to the region of XEDS analysis within and edge of the nanoparticle respectively.
